# Supplementary material
Source: PubMed Central journal article supplement (PMC10548452)
Supplement: NIHMS1932525-supplement-2.pdf [file NIHMS1932525-supplement-2.pdf]

## ■ ASSOCIATED CONTENT

### SI Supporting Information

The Supporting Information is available free of charge at <https://pubs.acs.org/doi/10.1021/acs.jmedchem.1c00408>.

Molecular formula strings ([CSV](#))

Supplementary figures and tables, spectra of key intermediate **24** and target compounds, and HPLC analysis for target compounds ([PDF](#))
