# Supplementary material
Source: PubMed Central journal article supplement (PMC10548452)
Supplement: NIHMS1932525-supplement-SI.pdf [file NIHMS1932525-supplement-SI.pdf]

Supporting Information

**Structure-based Design and Development of Chemical Probes Targeting Putative MOR-CCR5 Heterodimers to Inhibit Opioid Exacerbated HIV-1 Infectivity**

Boshi Huang,<sup>†</sup> Huiqun Wang,<sup>†</sup> Yi Zheng,<sup>†</sup> Mengchu Li,<sup>†</sup> Guifeng Kang,<sup>†</sup> Victor Barreto-de-Souza,<sup>‡</sup> Nima Nassehi,<sup>‡</sup> Pamela E. Knapp,<sup>‡,&</sup> Dana E. Selley,<sup>‡</sup> Kurt F. Hauser,<sup>‡,&</sup> Yan Zhang<sup>†,\*</sup>

<sup>†</sup> Department of Medicinal Chemistry, Virginia Commonwealth University, 800 E. Leigh Street, Richmond, Virginia 23298, United States

<sup>‡</sup> Department of Pharmacology and Toxicology, Virginia Commonwealth University, 410 North 12th Street, Richmond, Virginia 23298, United States

<sup>&</sup> Department of Anatomy and Neurobiology, Virginia Commonwealth University, 1101 E. Marshall Street, Richmond, Virginia 23298, United States

\* To whom correspondence should be addressed. Phone: 804-828-0021. Fax: 804-828-7625. E-mail: [yzhang2@vcu.edu](mailto:yzhang2@vcu.edu)

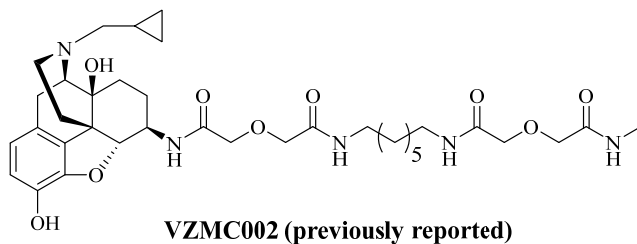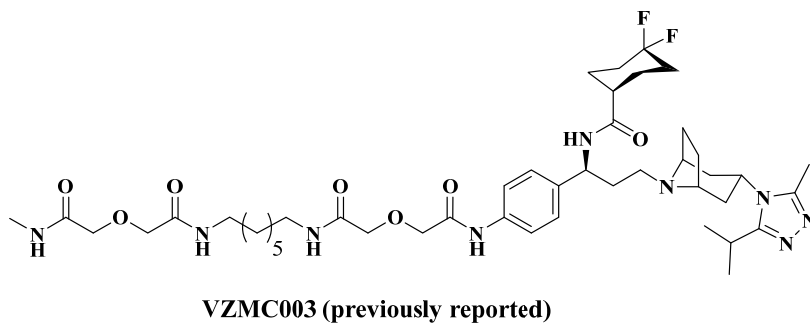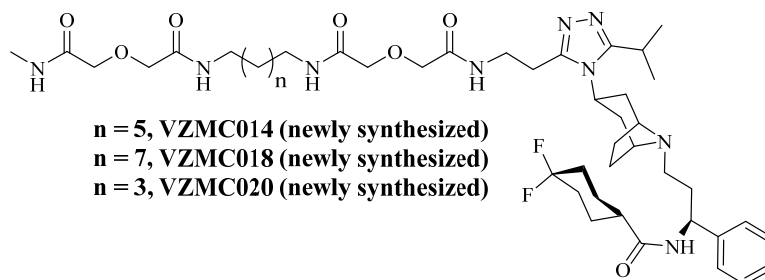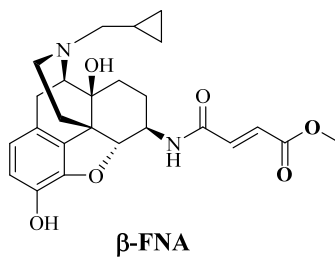

**Figure S1.** Chemical structures of corresponding bivalent ligands and monovalent control ligands and  $\beta$ -FNA.

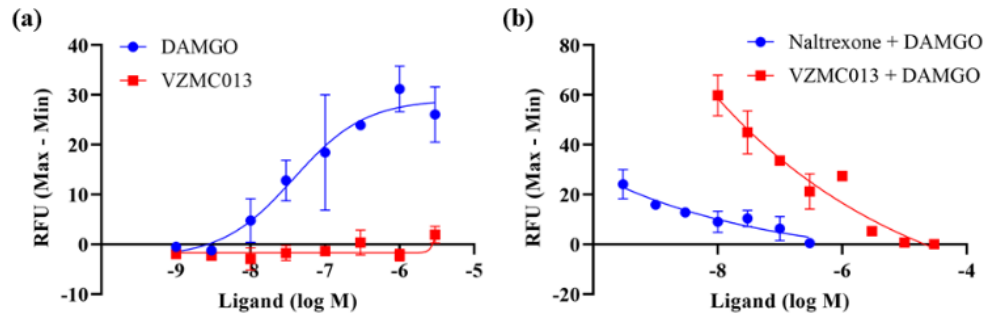

**Figure S2.** Effects of bivalent compound **VZMC013** on DAMGO-induced  $\text{Ca}^{2+}$  mobilization in Gqi5-transfected mMOR-CHO cells. (a) **VZMC013** exhibited no agonism to increase the intracellular calcium level. DAMGO was used as a control. (b) **VZMC013** dose-dependently antagonized the DAMGO-induced intracellular calcium increase. Naltrexone was used as a control.

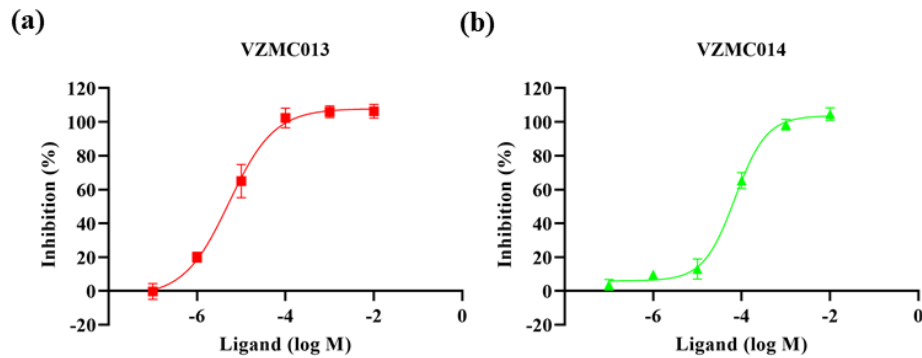

**Figure S3.** CCR5 Inhibition (%) corresponds to the ability of a tested compound to displace the radiolabeled ligand. (a) The competitive radioligand binding curve of **VZMC013**. (b) The competitive radioligand binding curve of **VZMC014**.

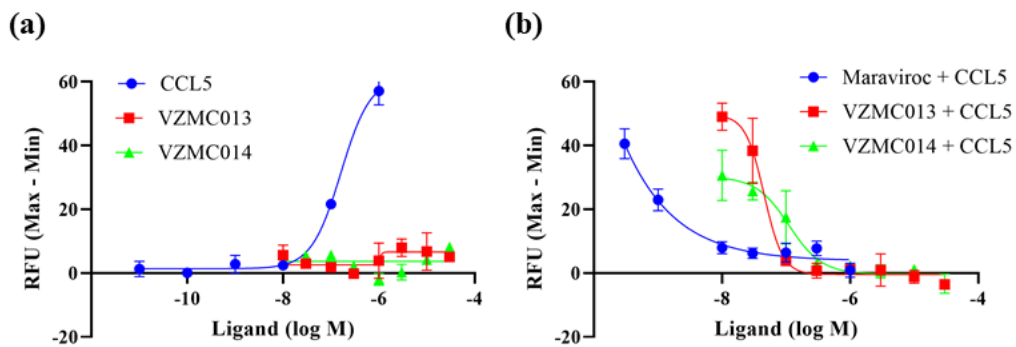

**Figure S4.** Effects of bivalent compound **VZMC013** and monovalent compound **VZMC014** on CCL5-induced  $\text{Ca}^{2+}$  mobilization in Gqi5-transfected HOS-CCR5 cells. (a) **VZMC013** and **VZMC014** failed to increase the intracellular calcium levels, suggesting a complete lack of agonist properties at CCR5. CCL5 was used as a control. (b) **VZMC013** and **VZMC014** dose-dependently antagonized CCL5-induced intracellular calcium increases. Maraviroc was used as a control.

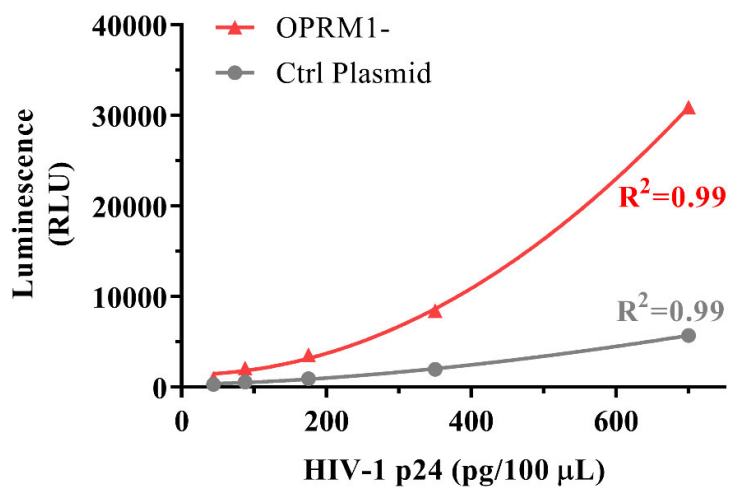

**Figure S5.** Comparison of intracellular concentration of HIV-1<sub>BaL</sub> (RLU) in OPRM1- and control plasmid transfected TZM-bl cells.

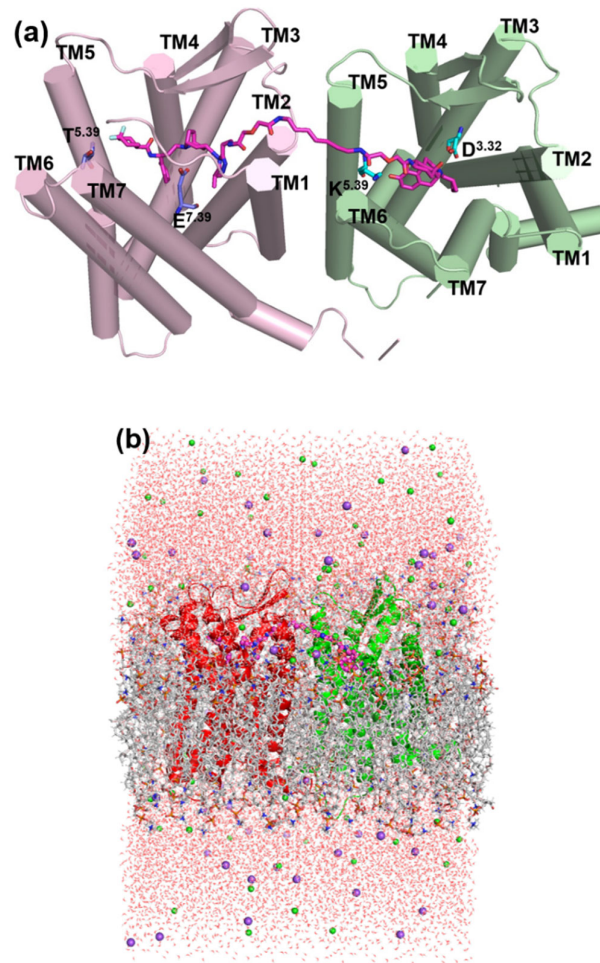

**Figure S6.** (a) The binding mode of VZMC013 in the MOR-CCR5 heterodimer complex. (b) The MOR-CCR5\_VZMC013 complex in the membrane-aqueous sodium chloride solution system.

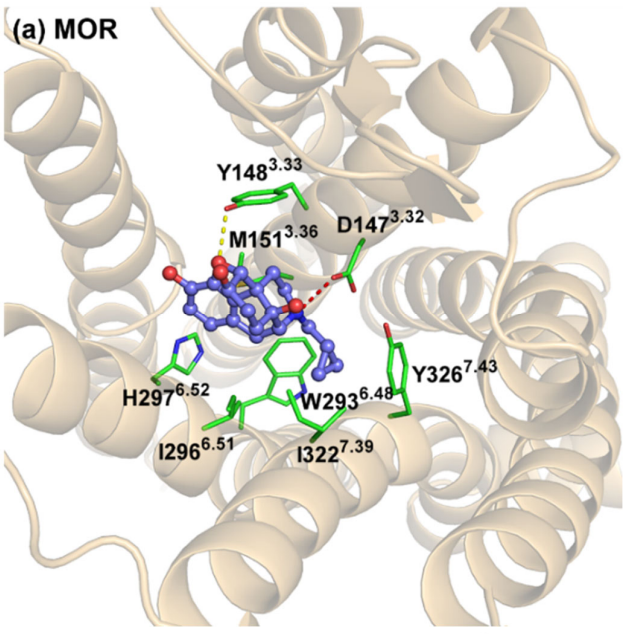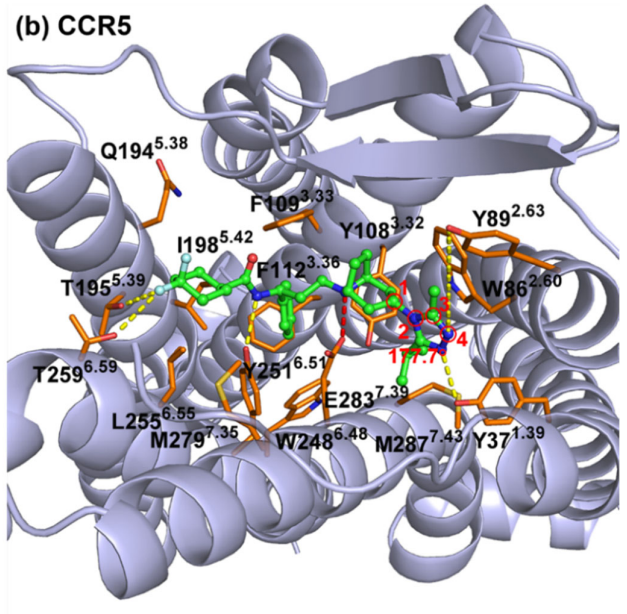

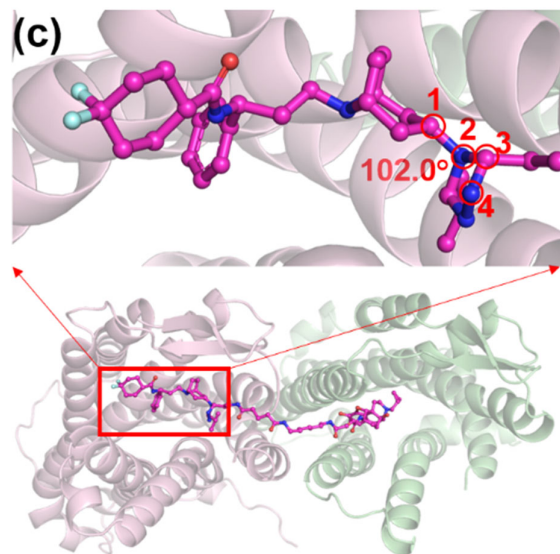

**Figure S7.** (a) The docking pose of naltrexone in the inactive MOR. (b) The binding mode of maraviroc in the crystal structure of the CCR5. The MOR and CCR5 shown as cartoon models in light-orange and light-blue, respectively. The key residues in the MOR and CCR5 shown as stick models in green and orange, respectively. Naltrexone and maraviroc shown as stick and sphere models in light-blue and green, respectively. The ionic interaction and hydrogen bond shown as dashed lines in red and yellow, respectively. (c) The rotation of the triazole moiety of **VZMC013** in the MOR-CCR5\_ **VZMC013** complex after 100 ns MD simulation. The atoms related to the dihedral angle were labeled with red circle.

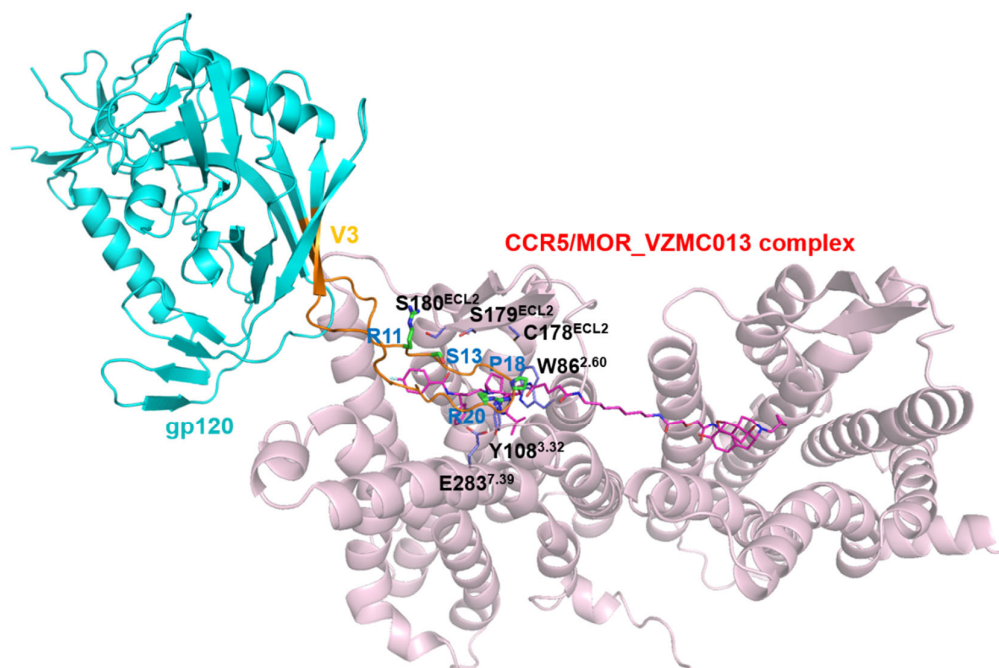

**Figure S8.** The putative binding of gp120 with the MOR-CCR5\_VZMC013 complex. gp120 shown as a cartoon model in cyan. V3 loop of gp120 shown as a cartoon model in orange. MOR-CCR5 heterodimer shown as a cartoon model in pink. Compound VZMC013 shown as a stick model in magentas. Key residues of the CCR5 and V3 loop shown as stick models in light-blue and green, which labeled in black and blue text, respectively.



**Table S1.** MOR radioligand binding affinity.

| Compounds         | Ki (nM)                |
|-------------------|------------------------|
| <b>VZMC002</b>    | 9.2 ± 3.4 <sup>a</sup> |
| <b>Naltrexone</b> | 0.7 ± 0.1 <sup>a</sup> |

<sup>a</sup>Data have been reported in Reference 1, and are presented here for comparison.

**Table S2.** CCR5 radioligand binding affinity.<sup>a</sup>

| Compounds      | Ki (nM) <sup>b</sup> |
|----------------|----------------------|
| <b>VZMC014</b> | 41 ± 1               |
| <b>VZMC018</b> | 7.15 ± 0.26          |
| <b>VZMC020</b> | ND <sup>c</sup>      |
| <b>MIP-1β</b>  | 0.056 ± 0.006        |

<sup>a</sup>[<sup>125</sup>I]MIP-1α was used as the radioligand in the binding assay.

<sup>b</sup>Ki values were calculated using the Cheng-Prusoff equation. The values are the mean ± SEM of at least three independent experiments.

<sup>c</sup>Not determined.

**Table S3.** Inhibition of CCL5-stimulated intracellular Ca<sup>2+</sup> mobilization.<sup>a</sup>

| Compounds        | IC <sub>50</sub> (nM) |
|------------------|-----------------------|
| <b>VZMC014</b>   | 116 ± 2.53            |
| <b>VZMC018</b>   | 39.6 ± 4.01           |
| <b>VZMC020</b>   | 919 ± 45.4            |
| <b>VZMC003</b>   | 622 ± 36 <sup>b</sup> |
| <b>Maraviroc</b> | 0.77 ± 0.20           |

<sup>a</sup>The values are the mean ± SEM of at least three independent experiments.

<sup>b</sup>Data have been reported in Reference 1, and are presented here for comparison purposes.

**Table S4.** Inhibition of HIV-1<sub>BaL</sub> and cytotoxicity in GHOST CCR5 cells.<sup>a</sup>

| Compounds        | EC <sub>50</sub> (μM) | TC <sub>50</sub> (μM) | TI   |
|------------------|-----------------------|-----------------------|------|
| <b>VZMC014</b>   | 2.62 ± 1.25           | > 100                 | > 38 |
| <b>VZMC002</b>   | > 100                 | > 100                 | -    |
| <b>Maraviroc</b> | 0.018 ± 0.002         | > 0.5                 | > 28 |

<sup>a</sup>Measured in triplicate.

**Table S5.** Residues within 5 Å proximity of the bivalent ligand in association with the MOR-CCR5\_VZMC013 complex after 100 ns MD simulations.<sup>a</sup>

| Portions of the bivalent ligand VZMC013 | Interactional residues                                                                                                                                                                                                                                                                                                                                                                                                                                                                                                                            |
|-----------------------------------------|---------------------------------------------------------------------------------------------------------------------------------------------------------------------------------------------------------------------------------------------------------------------------------------------------------------------------------------------------------------------------------------------------------------------------------------------------------------------------------------------------------------------------------------------------|
| The CCR5 pharmacophore                  | <b>Y37</b> <sup>1.39</sup> , <b>W86</b> <sup>2.60</sup> , <b>Y89</b> <sup>2.63</sup> , <b>Y108</b> <sup>3.32</sup> , <b>F109</b> <sup>3.33</sup> , <b>F112</b> <sup>3.36</sup> , N163 <sup>4.64</sup> , C178 <sup>ECL2</sup> , S179 <sup>ECL2</sup> , S180 <sup>ECL2</sup> , F182 <sup>ECL2</sup> , <b>T195</b> <sup>5.39</sup> , <b>I198</b> <sup>5.42</sup> , <b>W248</b> <sup>6.48</sup> , <b>Y251</b> <sup>6.51</sup> , <b>L255</b> <sup>6.55</sup> , <b>T259</b> <sup>6.59</sup> , <b>E283</b> <sup>7.39</sup> , <b>M287</b> <sup>7.43</sup> |
| The MOR pharmacophore                   | <b>D147</b> <sup>3.32</sup> , <b>Y148</b> <sup>3.33</sup> , <b>M151</b> <sup>3.36</sup> , L232 <sup>5.38</sup> , V236 <sup>5.42</sup> , <b>I296</b> <sup>6.51</sup> , <b>H297</b> <sup>6.52</sup> , V300 <sup>6.55</sup> , W318 <sup>7.35</sup> , <b>I322</b> <sup>7.39</sup>                                                                                                                                                                                                                                                                     |
| Spacer                                  | A30 <sup>1.32</sup> , R31 <sup>1.33</sup> , A87 <sup>2.61</sup> , A90 <sup>2.64</sup> , A91 <sup>2.65</sup> , W226 <sup>5.32</sup> , N230 <sup>5.36</sup> , E229 <sup>5.35</sup> , K233 <sup>5.39</sup> , K303 <sup>6.58</sup>                                                                                                                                                                                                                                                                                                                    |

<sup>a</sup>The residues in **Bold** represented the residues playing important roles in the binding of compound VZMC013 with the MOR-CCR5 heterodimer and these residues also presented in the binding of maraviroc and naltrexone in their respective receptors, the CCR5 and MOR.

**Table S6.** Residues with 5 Å around maraviroc and naltrexone in the respective receptors, CCR5 and MOR.<sup>a</sup>

| Complex        | Residues                                                                                                                                                                                                                                                                                                                                                                                                                                                                     |
|----------------|------------------------------------------------------------------------------------------------------------------------------------------------------------------------------------------------------------------------------------------------------------------------------------------------------------------------------------------------------------------------------------------------------------------------------------------------------------------------------|
| CCR5_Maraviroc | <b>Y37</b> <sup>1.39</sup> , <b>W86</b> <sup>2.60</sup> , <b>Y89</b> <sup>2.63</sup> , <b>Y108</b> <sup>3.32</sup> , <b>F109</b> <sup>3.33</sup> , <b>F112</b> <sup>3.36</sup> , Q194 <sup>5.38</sup> , <b>T195</b> <sup>5.39</sup> , <b>I198</b> <sup>5.42</sup> , <b>W248</b> <sup>6.48</sup> , <b>Y251</b> <sup>6.51</sup> , <b>L255</b> <sup>6.55</sup> , <b>T259</b> <sup>6.59</sup> , M279 <sup>7.35</sup> , <b>E283</b> <sup>7.39</sup> , <b>M287</b> <sup>7.43</sup> |
| MOR_Naltrexone | <b>D147</b> <sup>3.32</sup> , <b>Y148</b> <sup>3.33</sup> , <b>M151</b> <sup>3.36</sup> , W293 <sup>6.48</sup> , <b>I296</b> <sup>6.51</sup> , <b>H297</b> <sup>6.52</sup> , <b>I322</b> <sup>7.39</sup> , <b>Y326</b> <sup>7.43</sup>                                                                                                                                                                                                                                       |

<sup>a</sup>The residues in **Bold** represented the residues played important roles in the binding of maraviroc and naltrexone with their respective receptors, CCR5 and MOR, also existed in the binding of compound VZMC013 with the MOR-CCR5 heterodimer.

**Table S7.** The distances between atom of ligand and atom of receptor in the MOR\_naltrexone, CCR5\_maraviroc, and MOR-CCR5\_VZMC013 complexes.

| Complex          | Atom@Ligand | Atom@Receptor            | Distance (Å) |
|------------------|-------------|--------------------------|--------------|
| MOR_naltrexone   | N17         | OD2@D147 <sup>3.32</sup> | 3.0          |
|                  | O15         | OH@Y148 <sup>3.33</sup>  | 2.8          |
|                  | C5          | CZ3@W293 <sup>6.48</sup> | 4.6          |
|                  | C36         | CZ@Y326 <sup>7.43</sup>  | 3.6          |
| CCR5_maraviroc   | C9          | CB@C178 <sup>ECL2</sup>  | 8.1          |
|                  | C22         | CZ@F182 <sup>ECL2</sup>  | 5.4          |
|                  | O1          | OG@S179 <sup>ECL2</sup>  | 6.0          |
|                  | O1          | OG@S180 <sup>ECL2</sup>  | 5.8          |
| MOR-CCR5_VZMC013 | N17         | OD2@D147 <sup>3.32</sup> | 7.1          |
|                  | O15         | OH@Y148 <sup>3.33</sup>  | 6.4          |
|                  | C5          | CZ3@W293 <sup>6.48</sup> | 8.2          |
|                  | C36         | CZ@Y326 <sup>7.43</sup>  | 7.3          |
|                  | C9          | CB@C178 <sup>ECL2</sup>  | 5.2          |
|                  | C22         | CZ@F182 <sup>ECL2</sup>  | 3.5          |
|                  | O1          | OG@S179 <sup>ECL2</sup>  | 3.4          |
|                  | O1          | OG@S180 <sup>ECL2</sup>  | 3.6          |

## Spectra of key intermediate 24 and target compounds

$^1\text{H}$  NMR,  $^{13}\text{C}$  NMR,  $^{19}\text{F}$  NMR, and HRMS spectra for 24

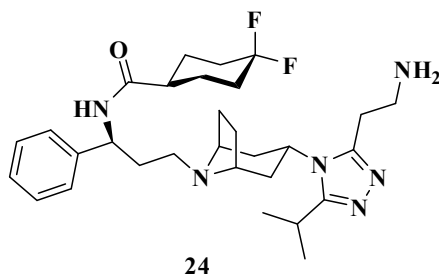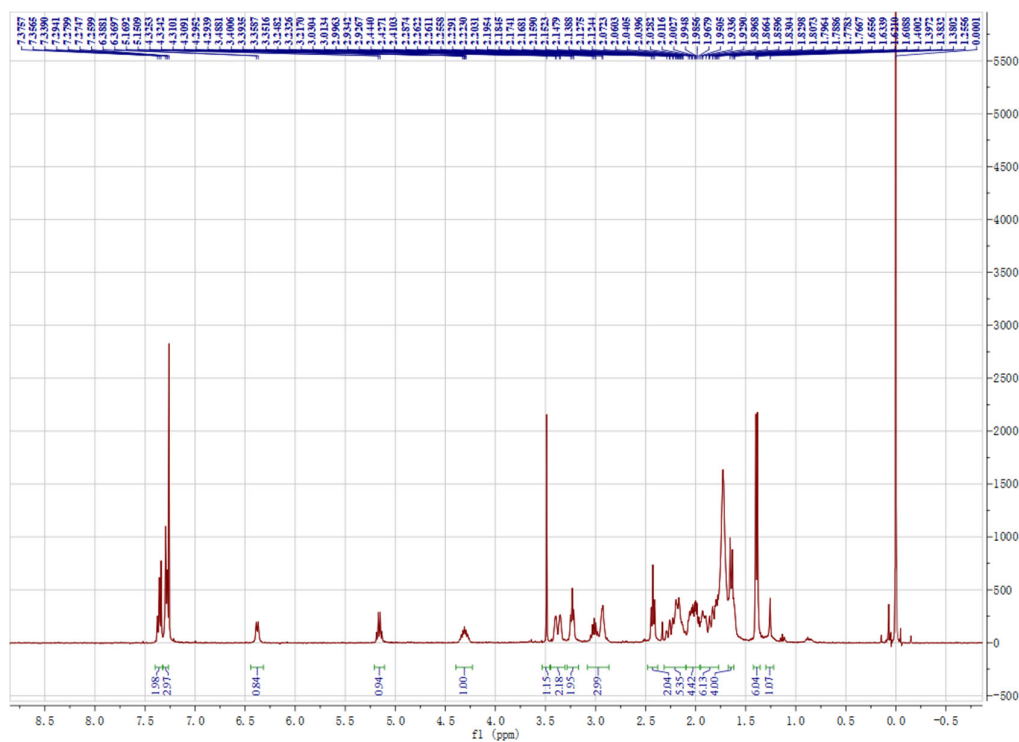

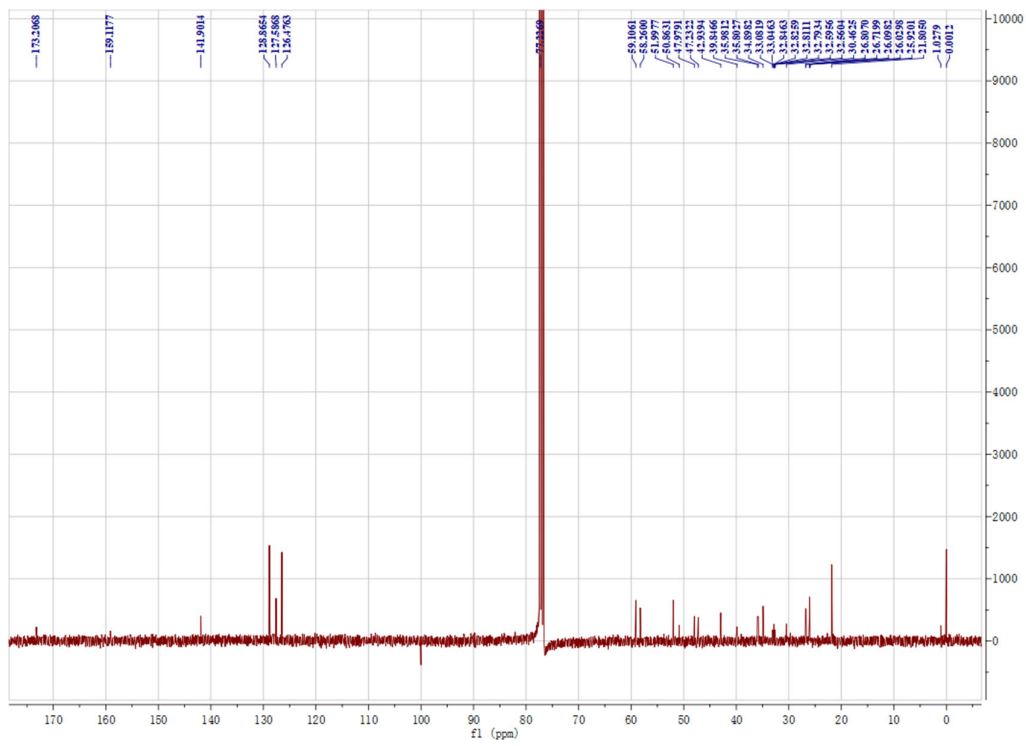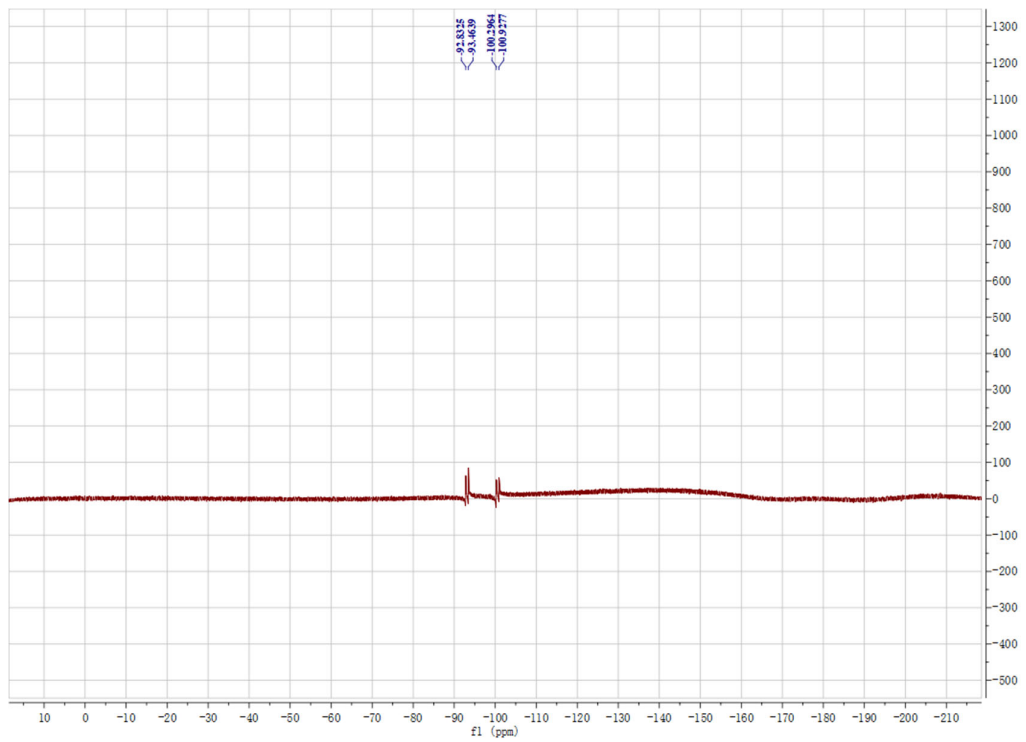

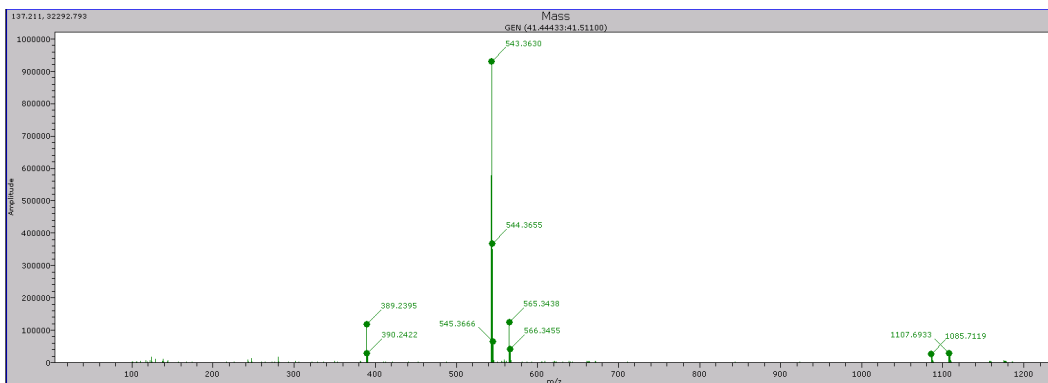

$^1\text{H}$  NMR,  $^{13}\text{C}$  NMR,  $^{19}\text{F}$  NMR, and HRMS spectra for **VZMC013**

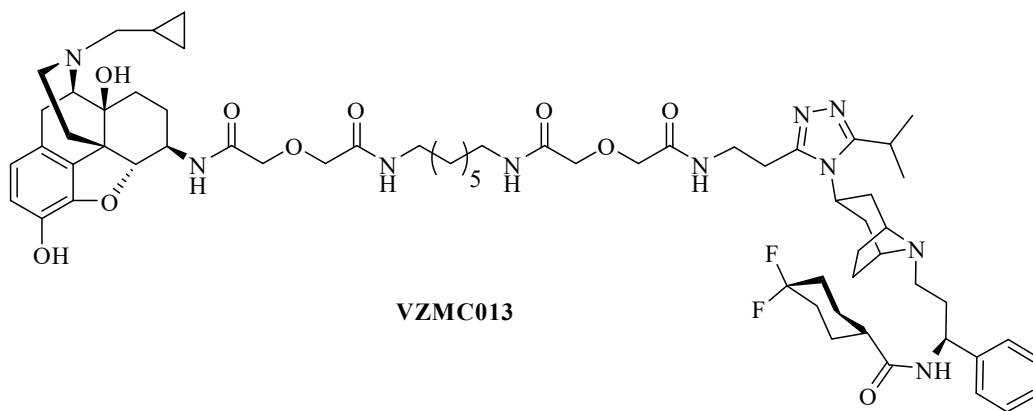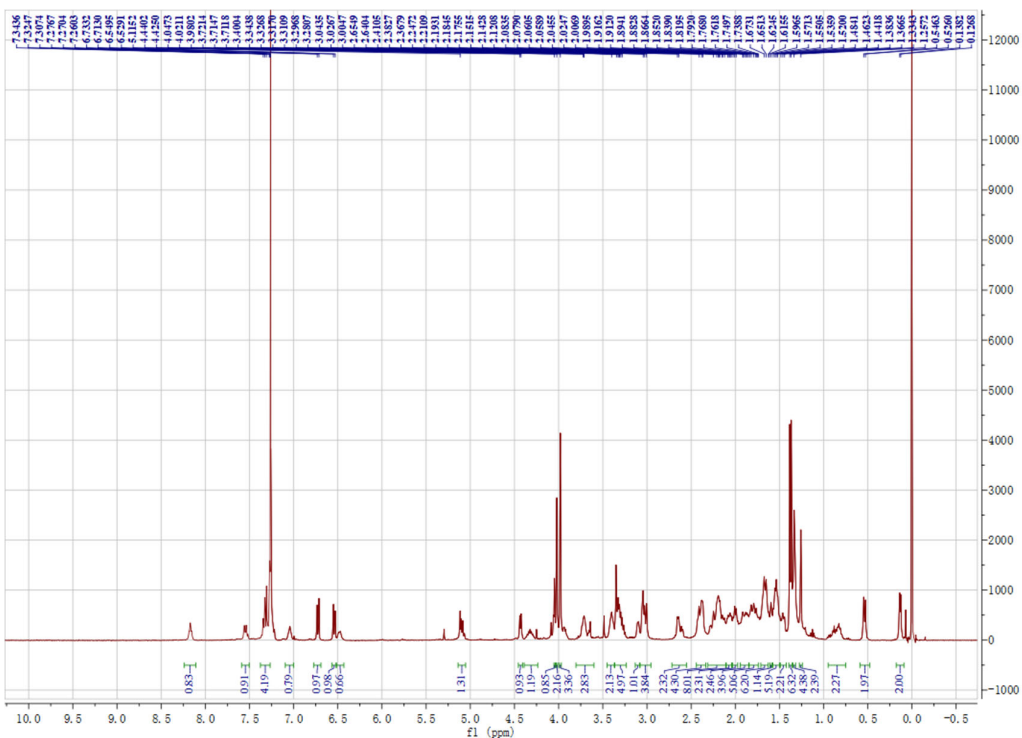

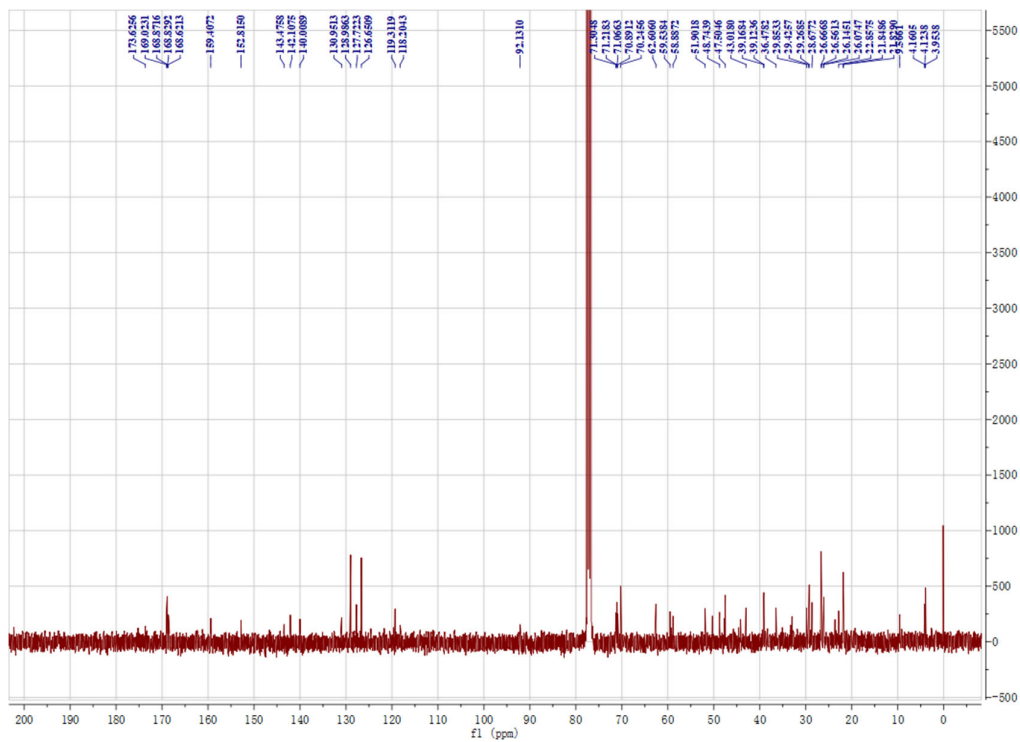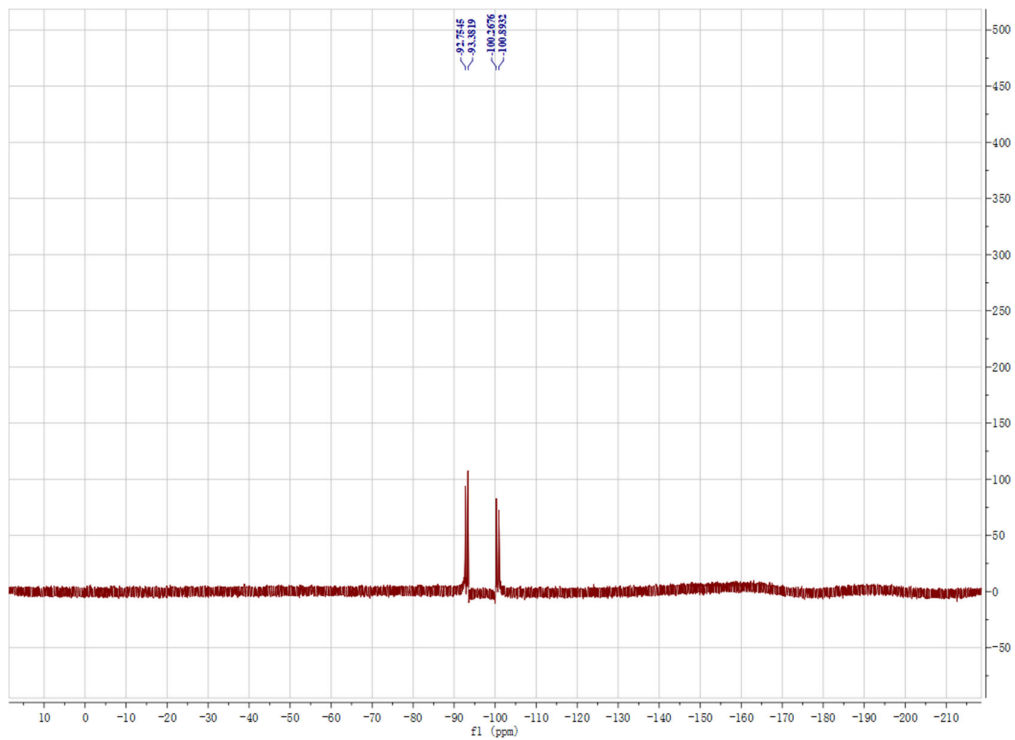

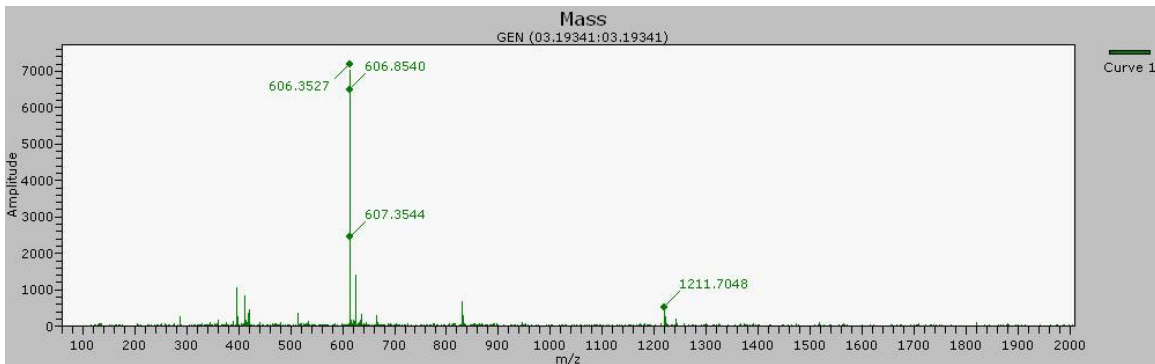

<sup>1</sup>H NMR, <sup>13</sup>C NMR, <sup>19</sup>F NMR, and HRMS spectra for **VZMC014**

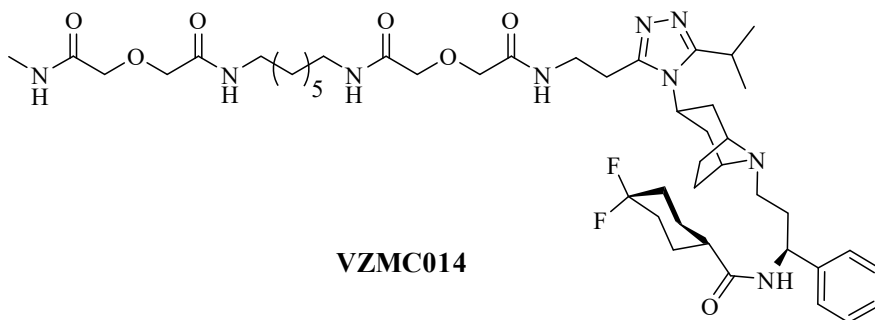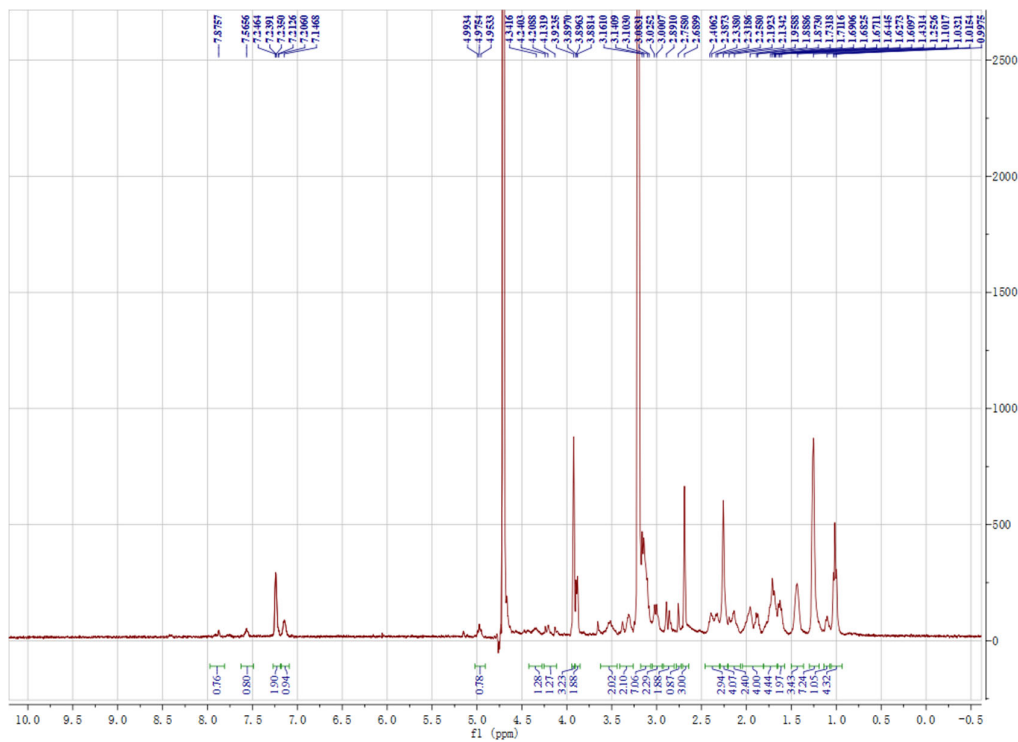



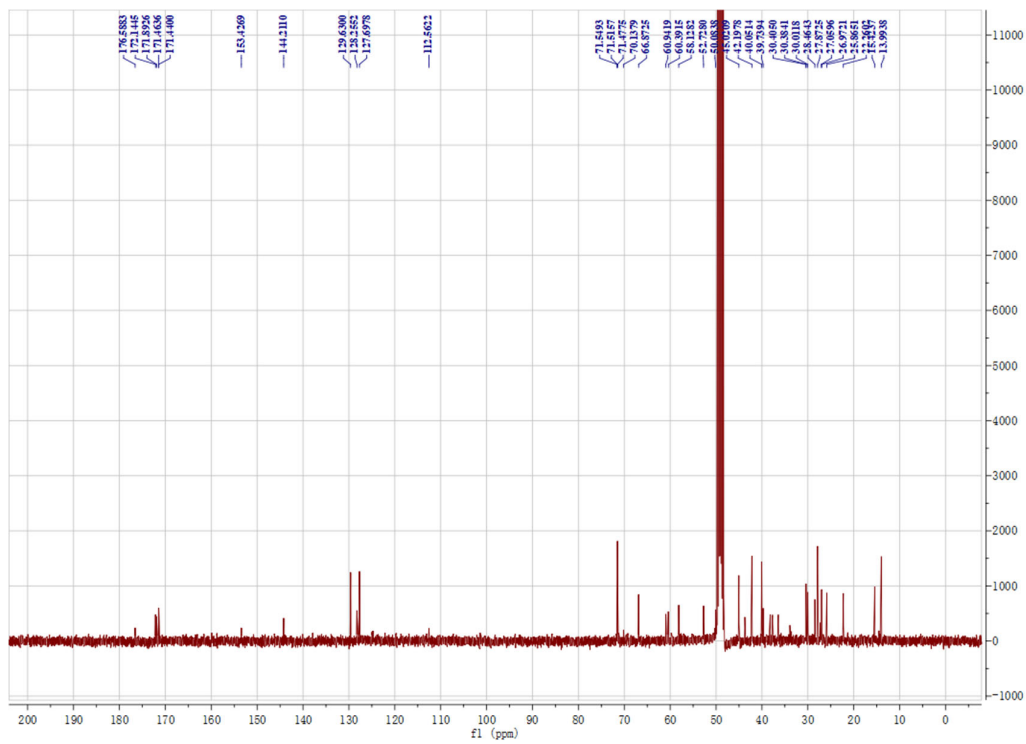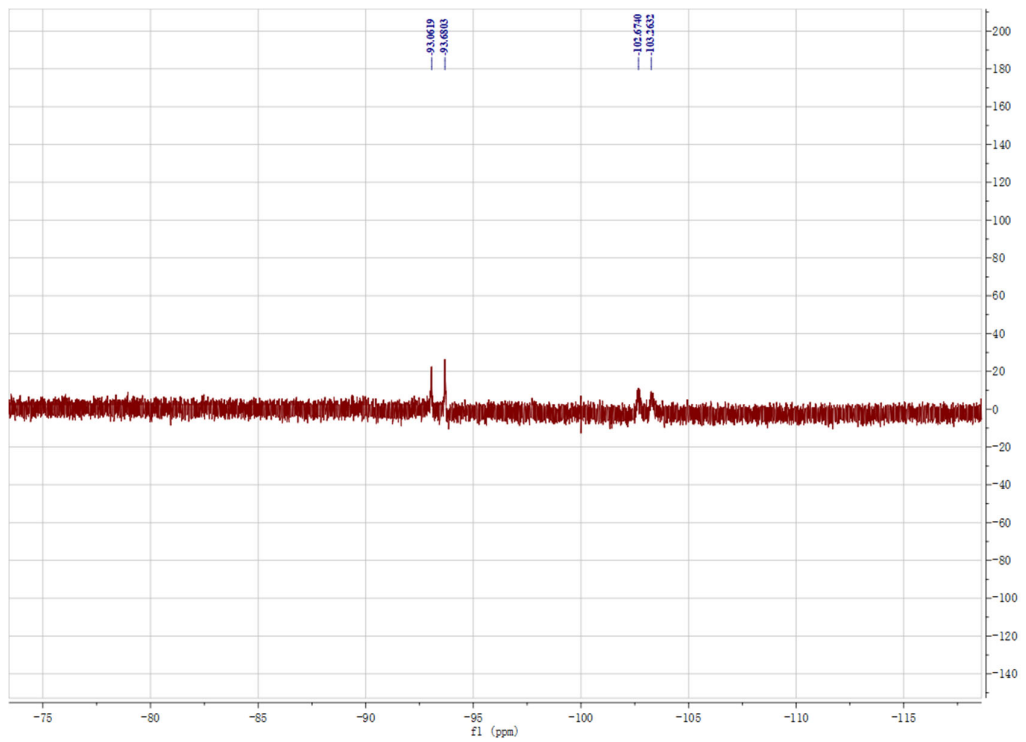

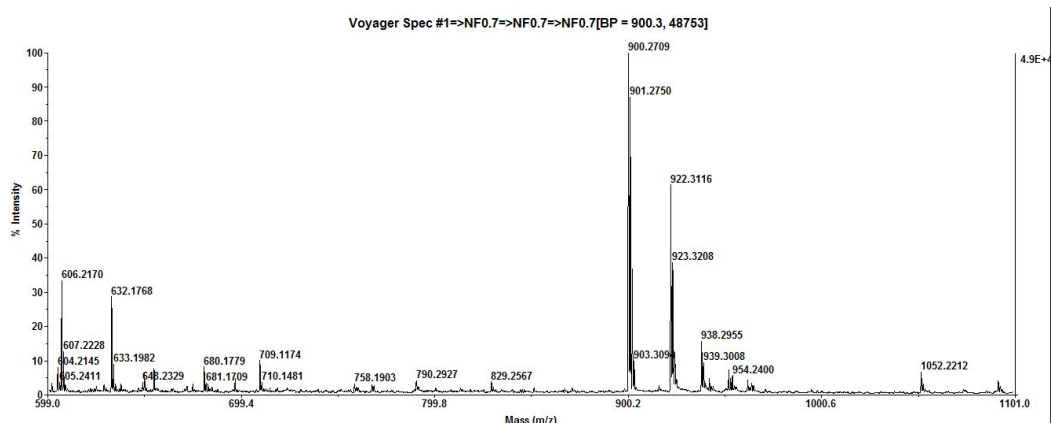

$^1\text{H}$  NMR,  $^{13}\text{C}$  NMR,  $^{19}\text{F}$  NMR, and HRMS spectra for **VZMC017**

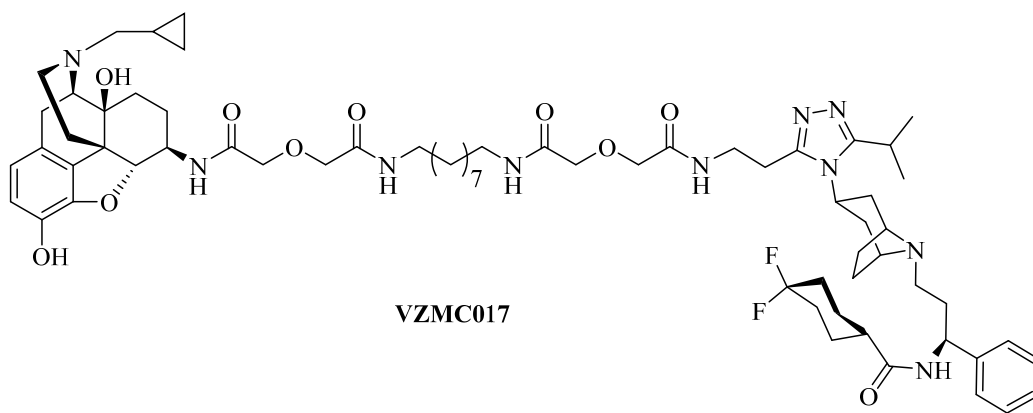

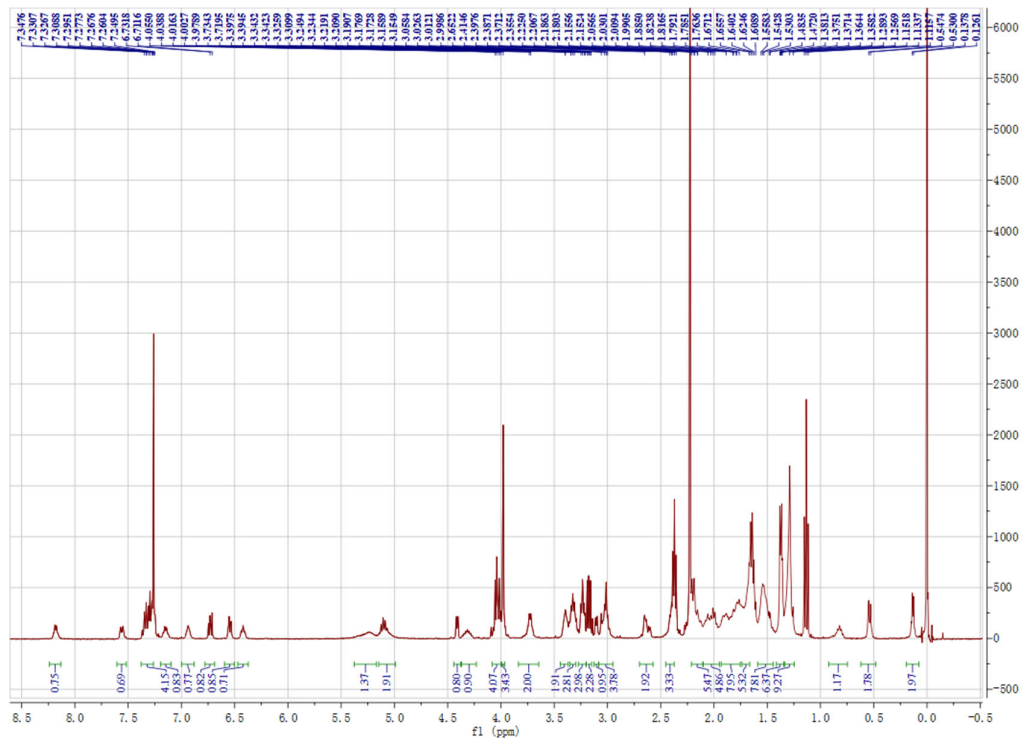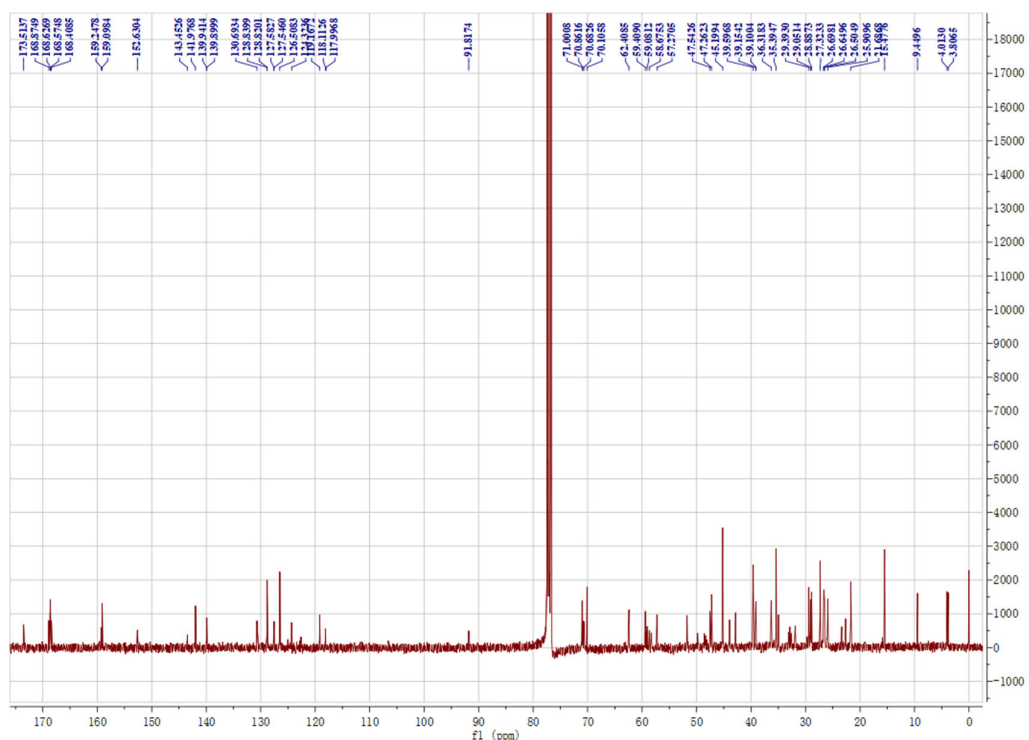

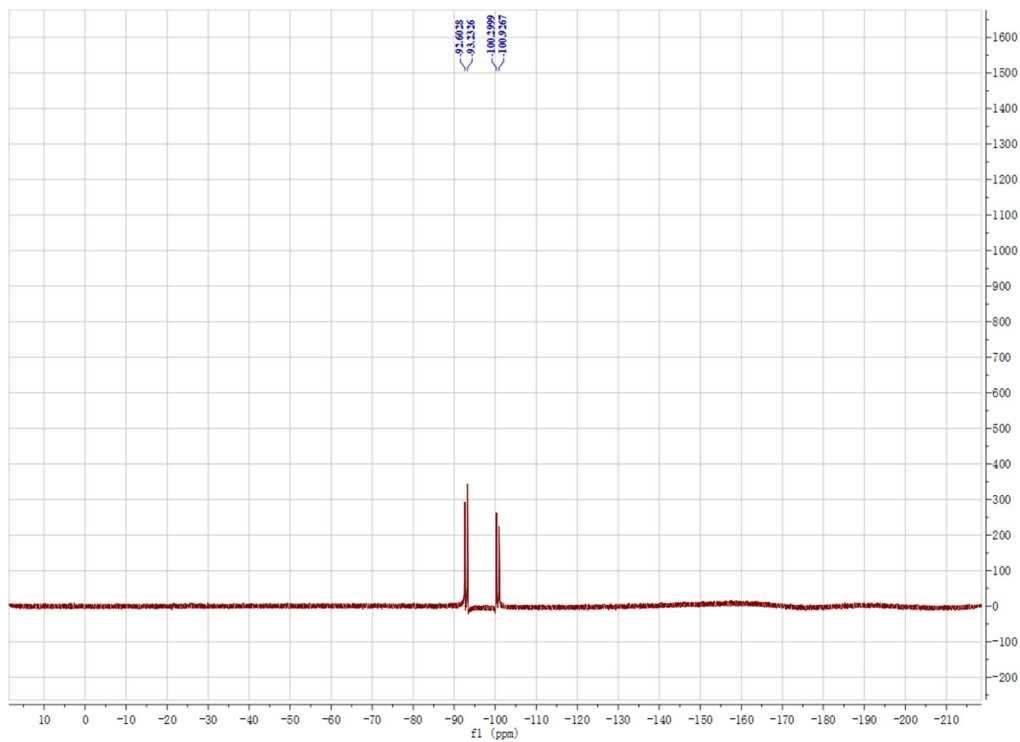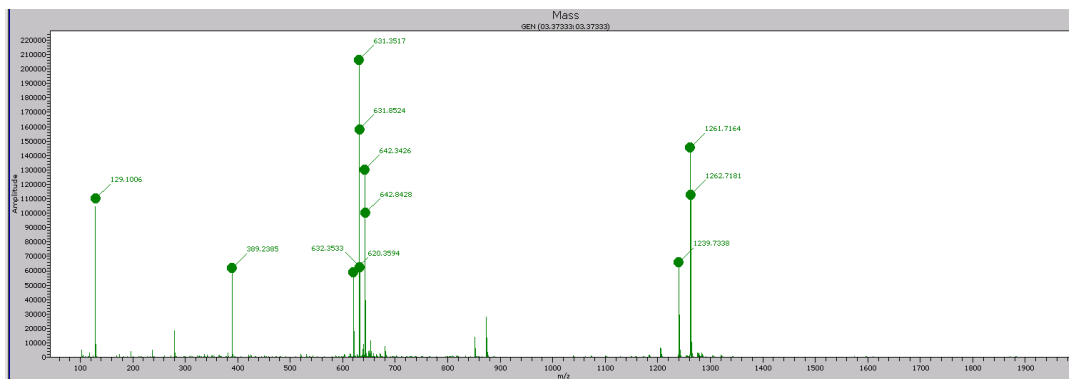

<sup>1</sup>H NMR, <sup>13</sup>C NMR, <sup>19</sup>F NMR, and HRMS spectra for **VZMC018**

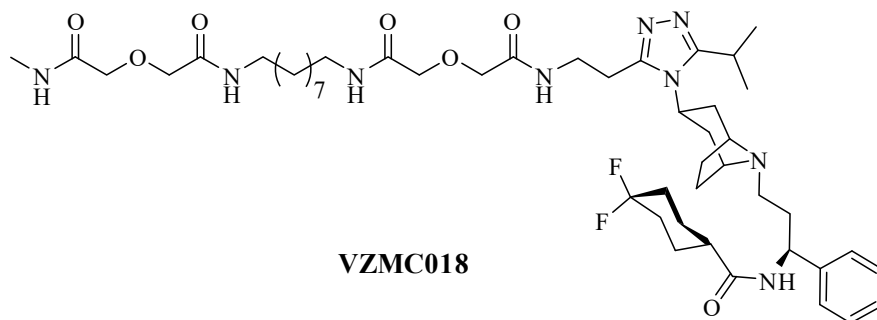



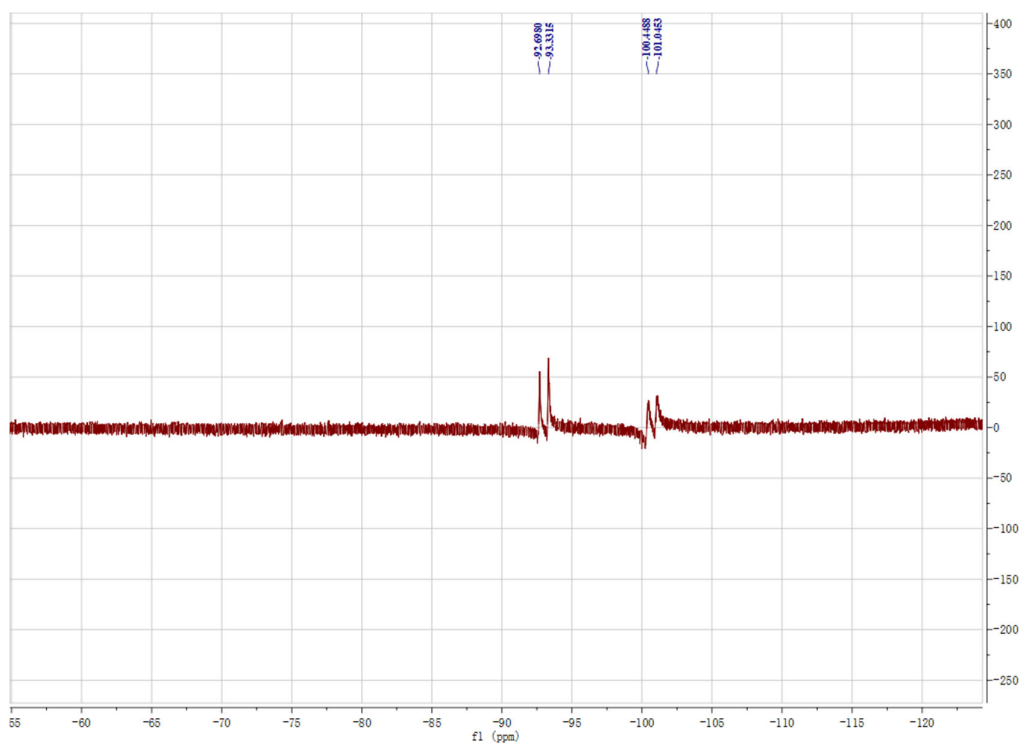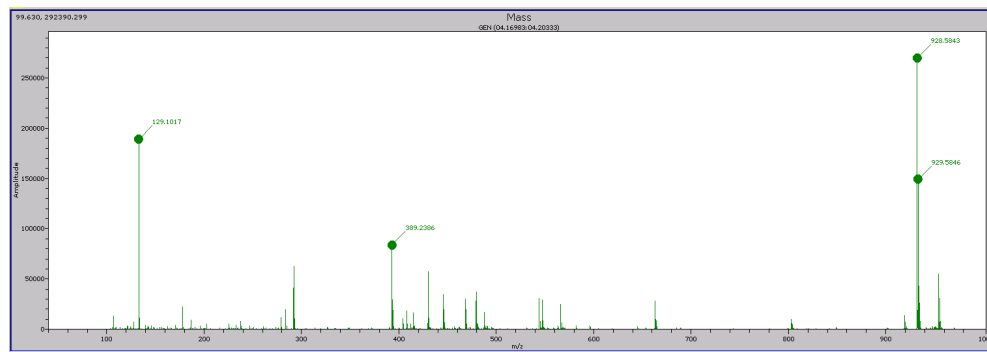

$^1\text{H}$  NMR,  $^{13}\text{C}$  NMR,  $^{19}\text{F}$  NMR, and HRMS spectra for **VZMC019**

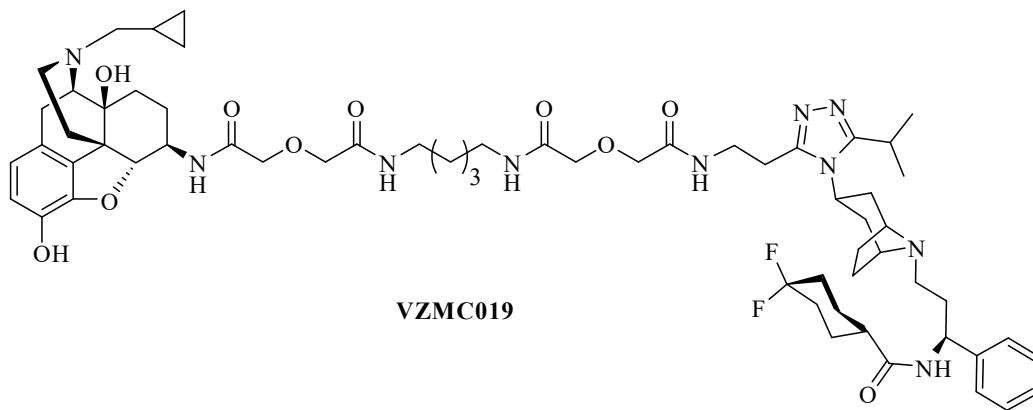

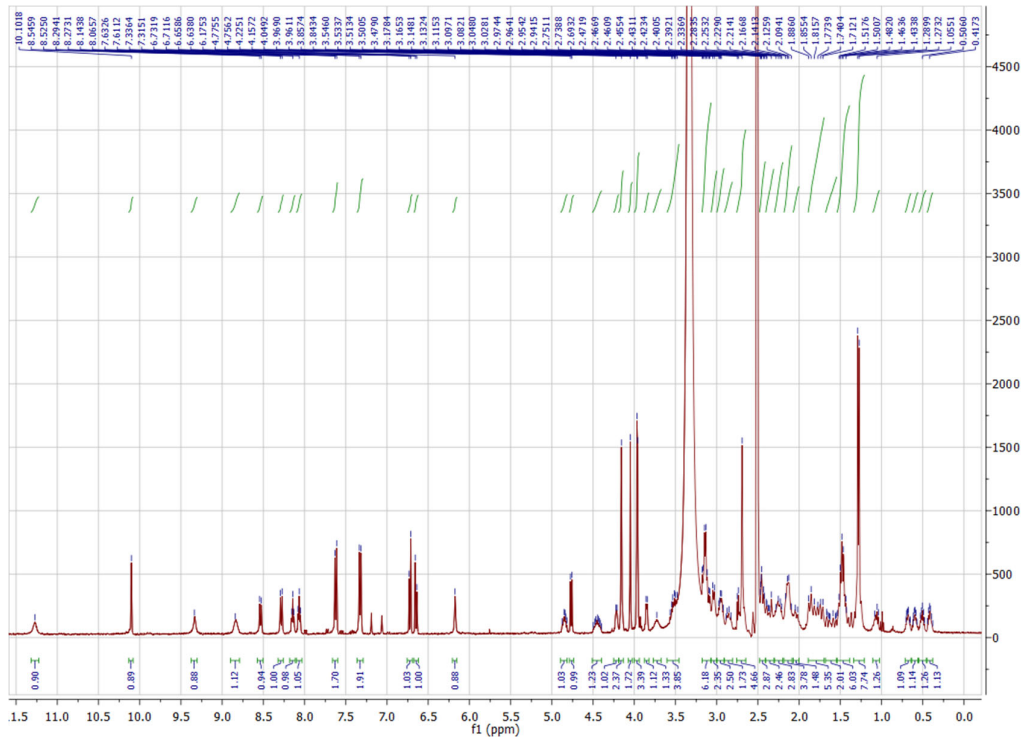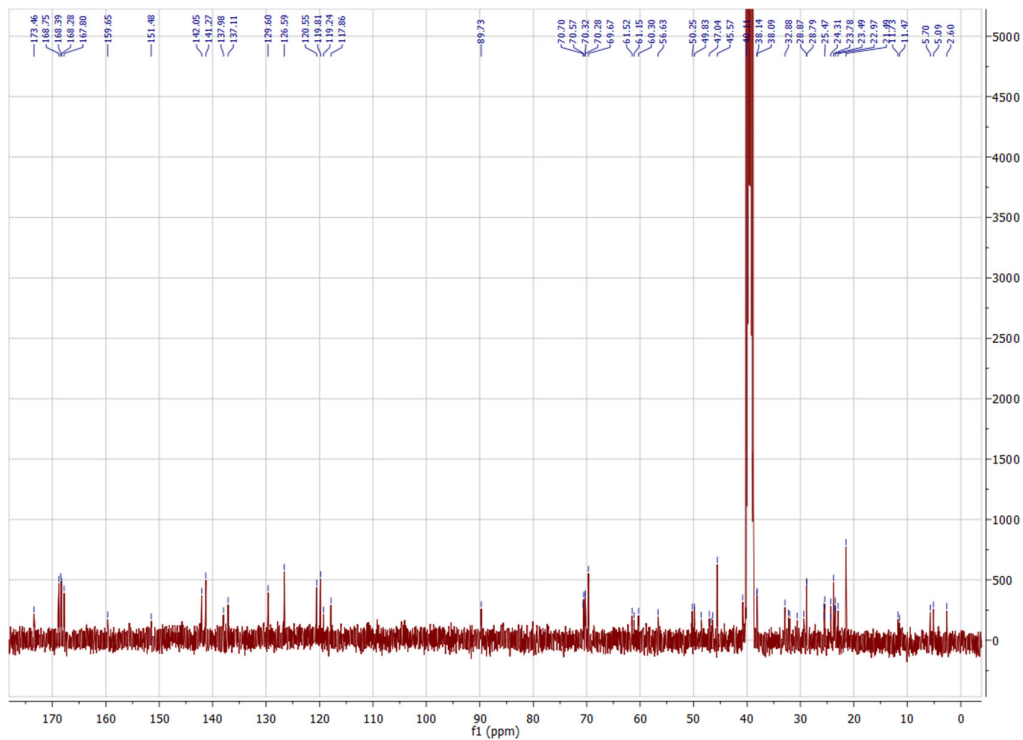

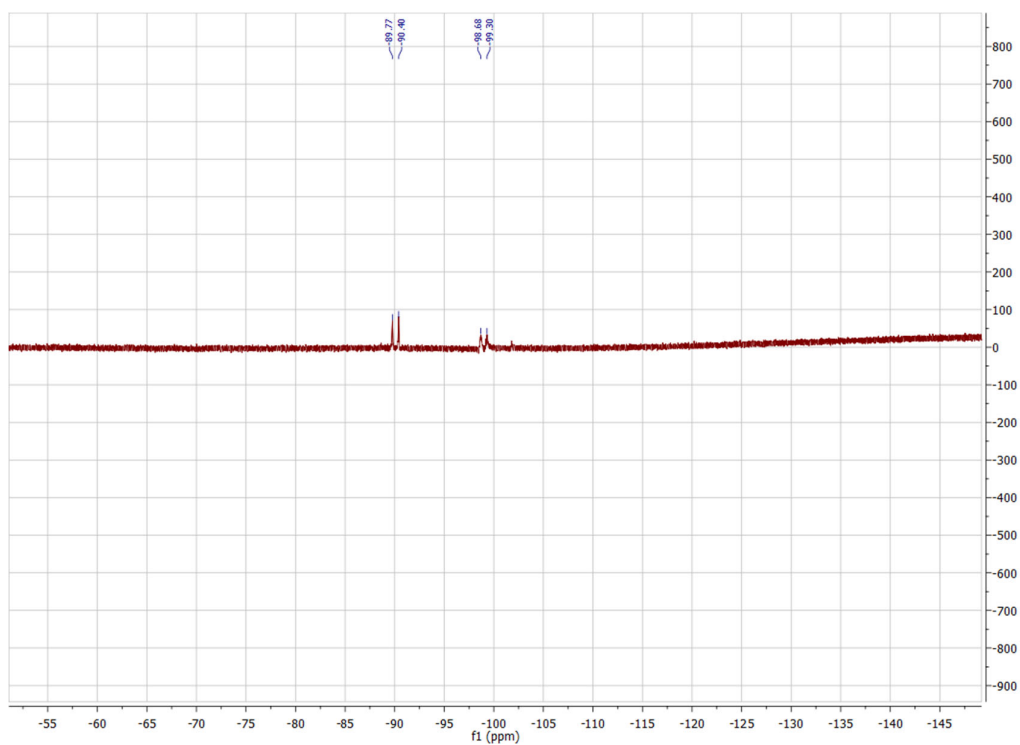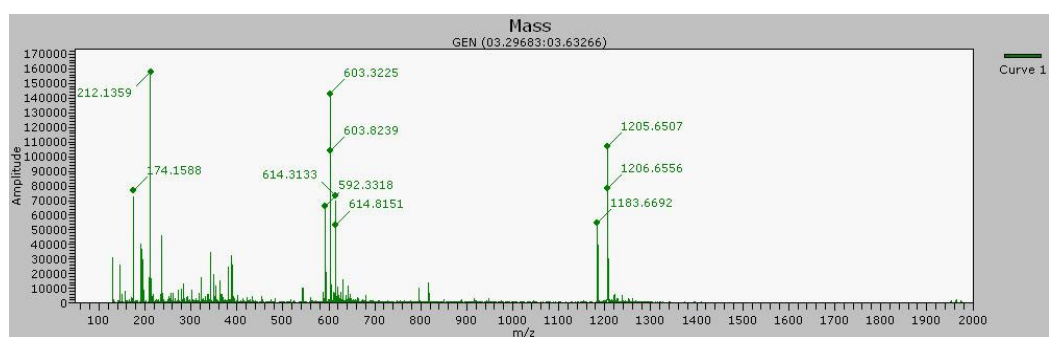

<sup>1</sup>H NMR, <sup>13</sup>C NMR, and <sup>19</sup>F NMR spectra for **VZMC020**

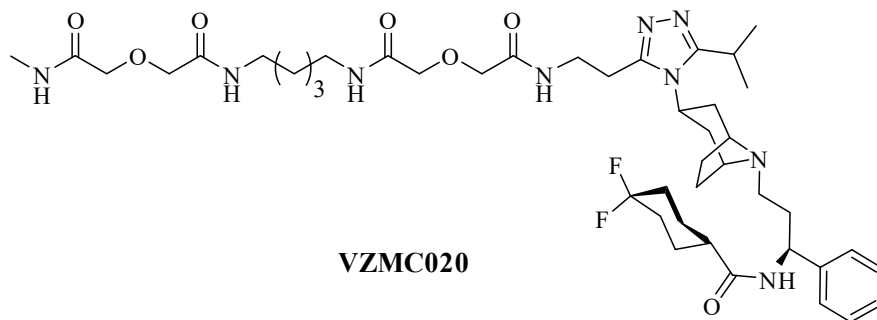



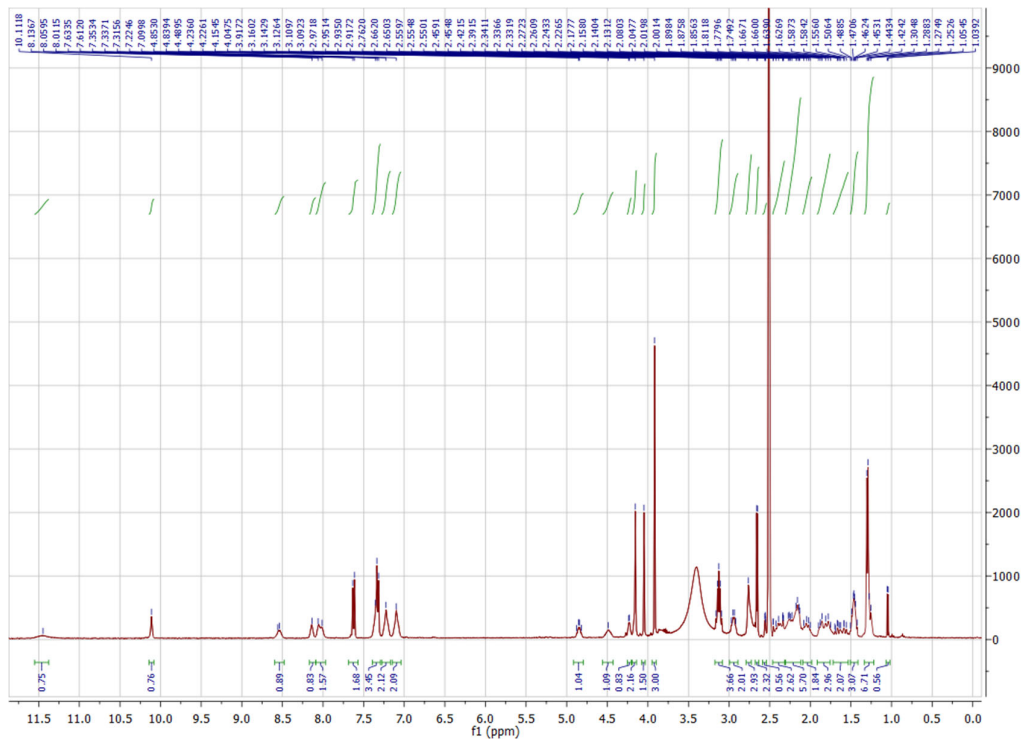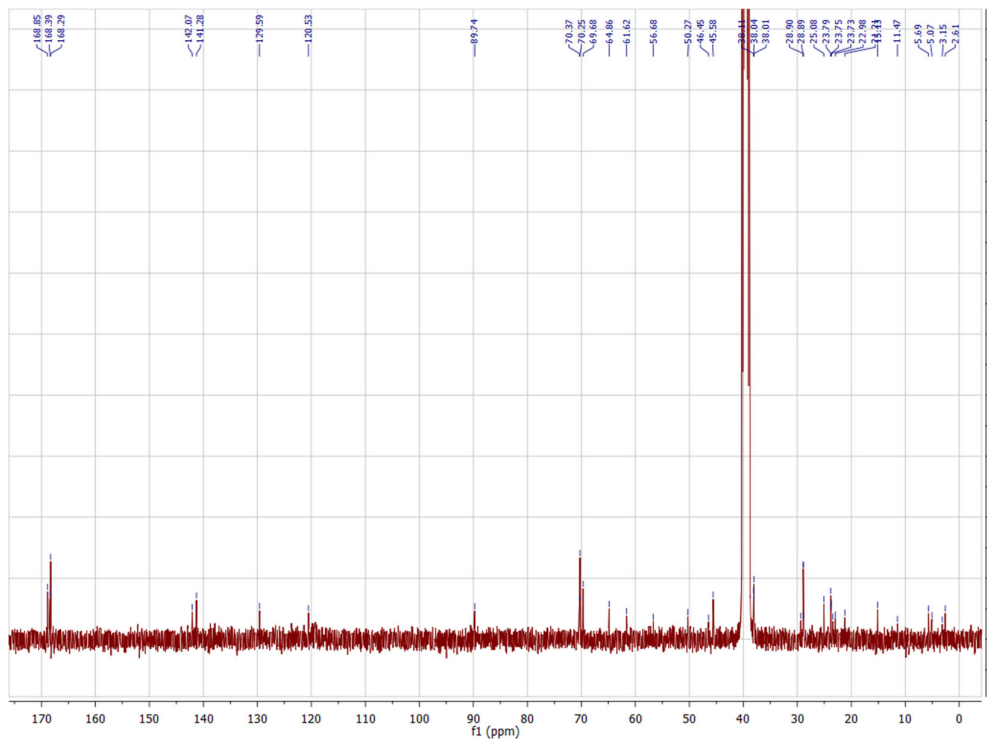

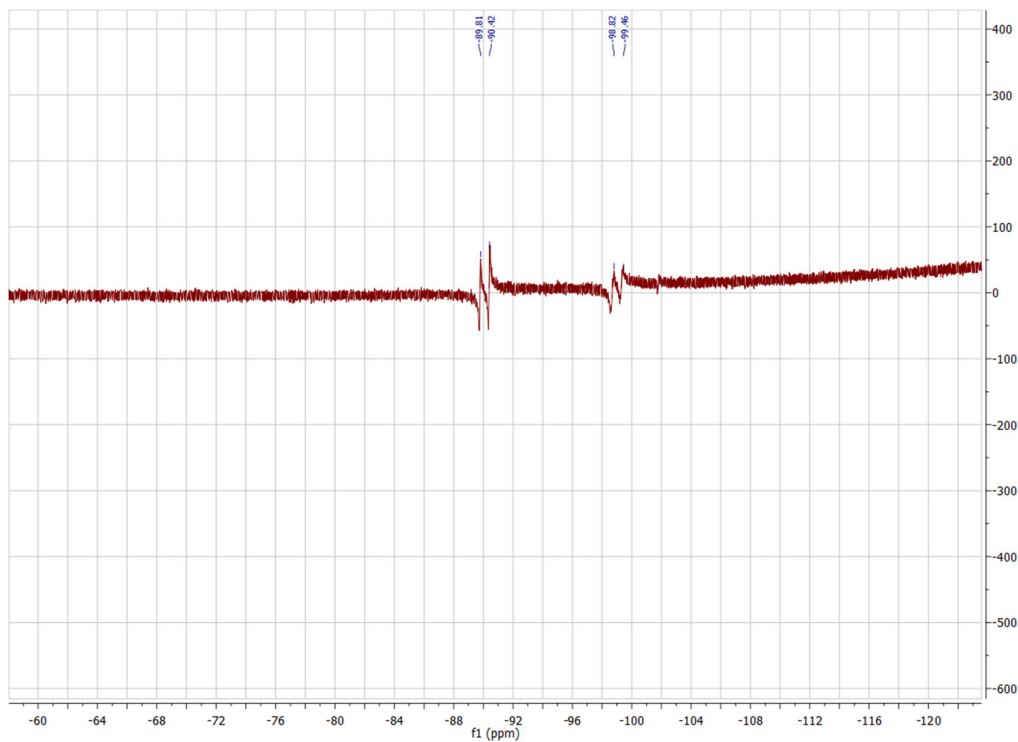

## HPLC analysis

### VZMC013

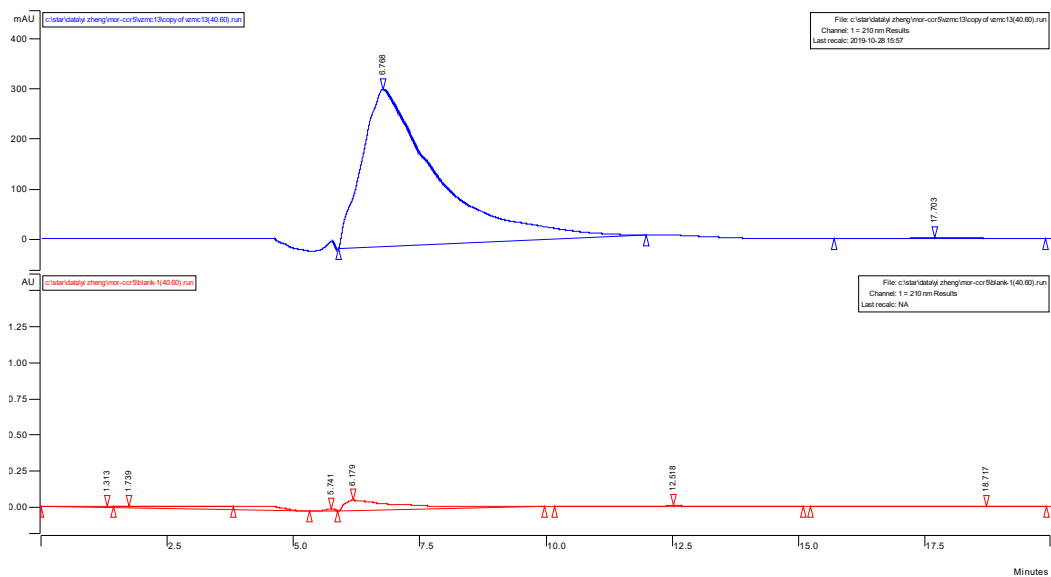

# VZMC014

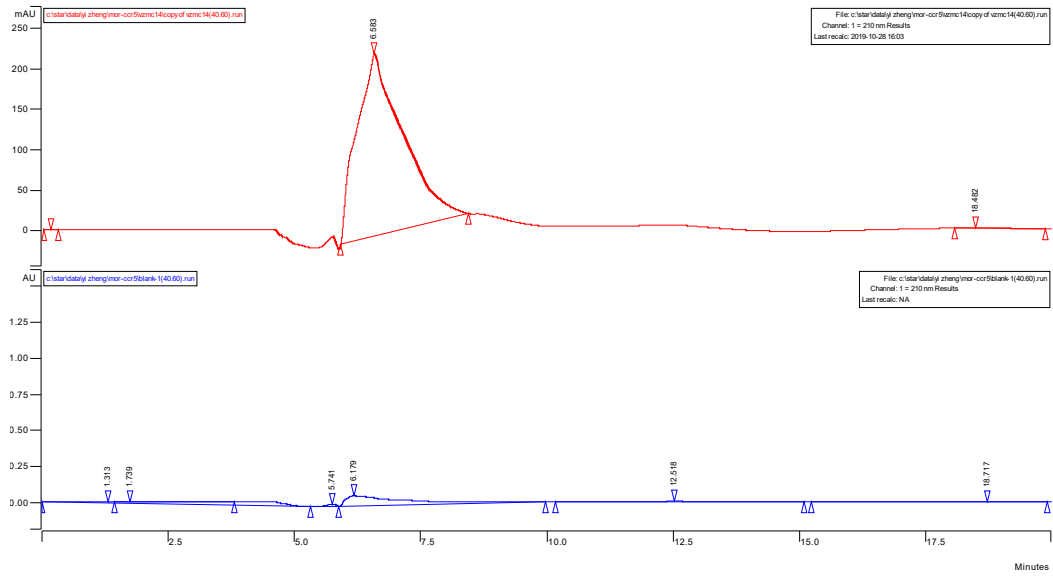

# VZMC017

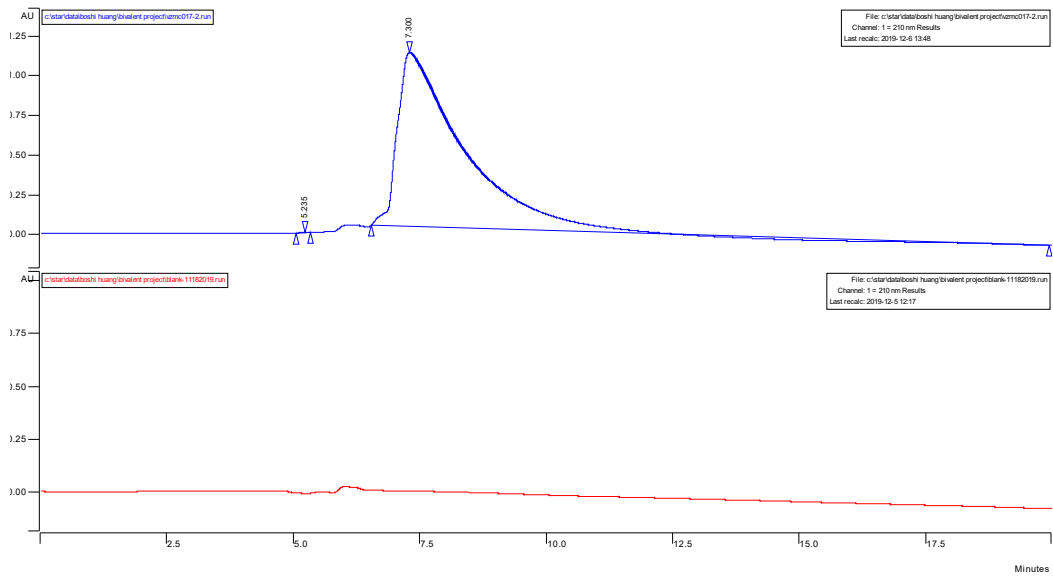

## VZMC018

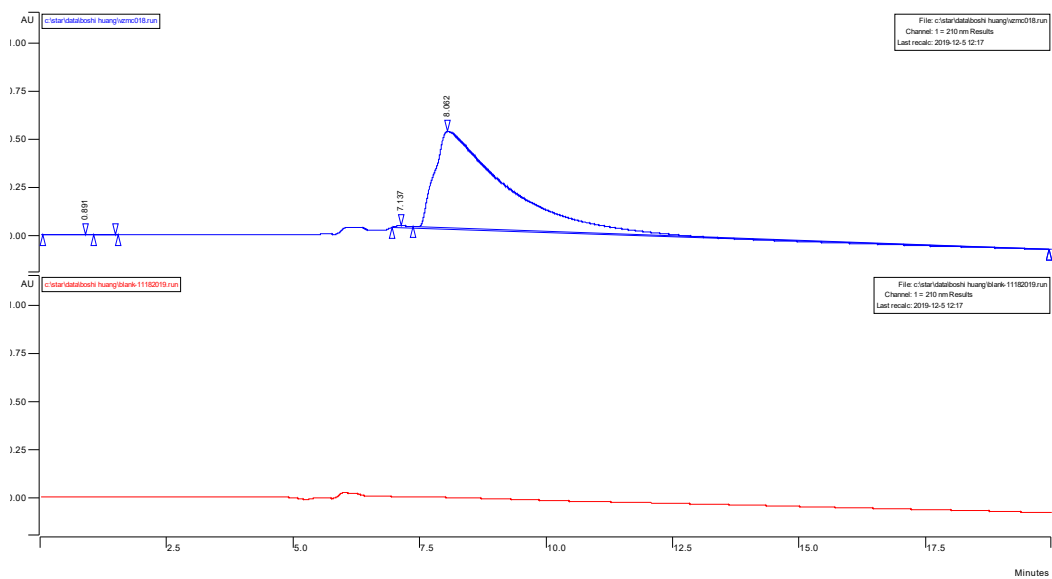

## VZMC019

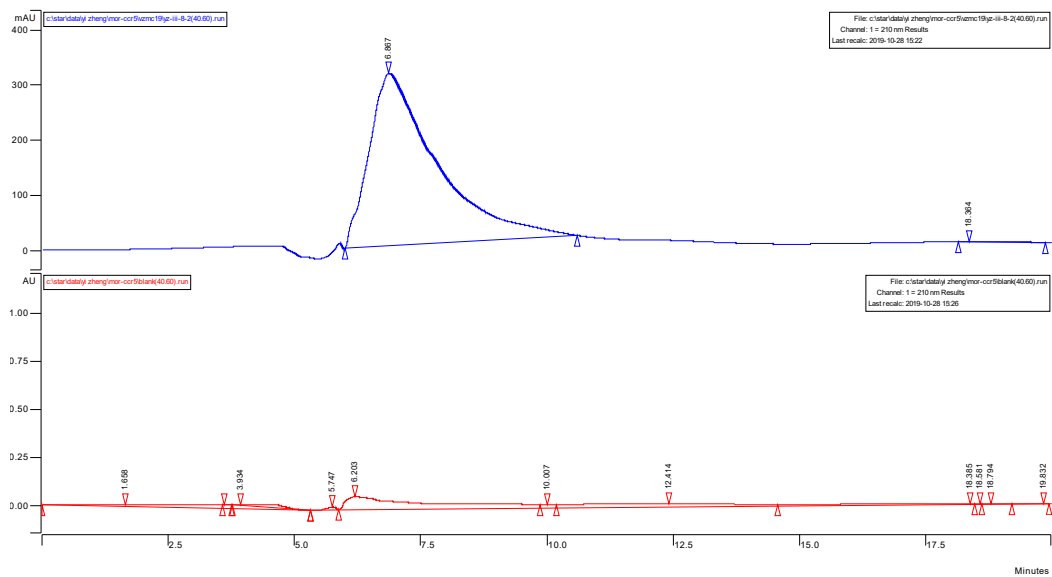

## VZMC020

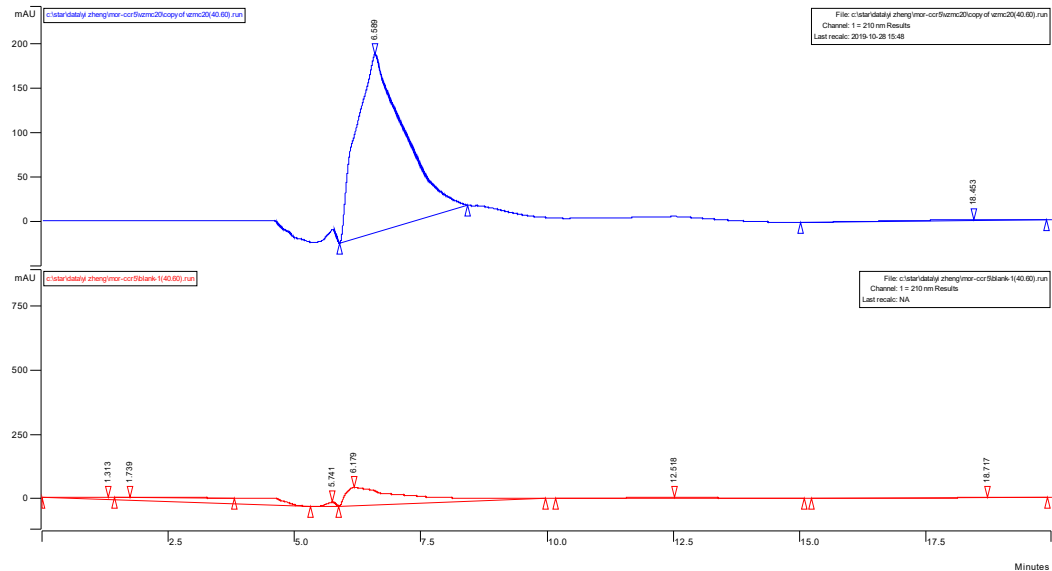

## References

1. Yuan, Y.; Arnatt, C. K.; El-Hage, N.; Dever, S. M.; Jacob, J. C.; Selley, D. E.; Hauser, K. F.; Zhang, Y., A bivalent ligand targeting the putative mu opioid receptor and chemokine receptor CCR5 heterodimer: binding affinity versus functional activities. *MedChemComm* **2013**, *4* (5), 847-851.
